# Supplementary material
Source: HighWire-hosted journal article supplement (https://gh.bmj.com/content/4/4/e001462)
Supplement: inline-supplementary-material-3 [file inline-supplementary-material-3.pdf]

Table S3. Association of available background characteristics with preterm births, and the prevalence of these characteristics in 5-year calendar periods from 1990 to 2014 in Matlab, Bangladesh.

| Characteristics          | Calendar period    |    |                  |    |                  |    |                  |    |                  |    |
|--------------------------|--------------------|----|------------------|----|------------------|----|------------------|----|------------------|----|
|                          | 1990-94            |    | 1995-99          |    | 2000-04          |    | 2005-09          |    | 2010-14          |    |
|                          | n=13 085           |    | n=12 798         |    | n=13 371         |    | n=12 066         |    | n=11 743         |    |
|                          | OR (95% CI)*       | P  | OR (95% CI)*     | P  | OR (95% CI)*     | P  | OR (95% CI)*     | P  | OR (95% CI)*     | P  |
| <b>Parity</b>            |                    |    |                  |    |                  |    |                  |    |                  |    |
| <3                       | 0.82 (0.75-0.89)   | 69 | 0.71 (0.65-0.77) | 75 | 0.55 (0.50-0.61) | 80 | 0.49 (0.44-0.56) | 86 | 0.55 (0.46-0.65) | 91 |
| ≥3                       | 1                  | 31 | 1                | 25 | 1                | 20 | 1                | 14 | 1                | 9  |
| <b>Education (years)</b> |                    |    |                  |    |                  |    |                  |    |                  |    |
| <6                       | 1                  | 72 | 1                | 58 | 1                | 41 | 1                | 37 | 1                | 24 |
| ≥6                       | 0.77 (0.70-0.84)   | 28 | 0.75 (0.69-0.81) | 42 | 0.64 (0.59-0.69) | 59 | 0.61 (0.55-0.67) | 63 | 0.72 (0.64-0.82) | 76 |
| <b>Age (years)</b>       |                    |    |                  |    |                  |    |                  |    |                  |    |
| <20                      | 0.87 (0.78-0.96)   | 16 | 0.88 (0.79-0.98) | 16 | 1.04 (0.93-1.16) | 18 | 1.14 (1.0-1.29)  | 29 | 1.10 (0.96-1.27) | 22 |
| ≥20                      | 1                  | 84 | 1                | 84 | 1                | 82 | 1                | 80 | 1                | 78 |
| <b>Wealth index</b>      |                    |    |                  |    |                  |    |                  |    |                  |    |
| 1-poorest                | 1                  | 17 | 1                | 18 | 1                | 18 | 1                | 16 | 1                | 17 |
| 2                        | 0.96 (0.85 – 1.09) | 19 | 0.94 (0.83-1.07) | 19 | 0.84 (0.74-0.96) | 17 | 0.73 (0.62-0.86) | 17 | 0.87 (0.72-1.05) | 18 |
| 3                        | 0.89 (0.79-1.01)   | 21 | 0.88 (0.78-1.00) | 20 | 0.78 (0.68-0.89) | 22 | 0.74 (0.64-0.87) | 20 | 0.79 (.065-0.95) | 19 |
| 4                        | 0.89 (0.79-1.01)   | 20 | 0.80 (0.71-0.91) | 23 | 0.78 (0.69-0.89) | 23 | 0.58 (0.50-0.68) | 23 | 0.78 (0.65-0.94) | 22 |
| 5-richest                | 0.87 (0.77-0.98)   | 23 | 0.69 (0.61-0.79) | 21 | 0.72 (0.63-0.83) | 20 | 0.51 (0.43-0.59) | 24 | 0.69 (0.58-0.83) | 26 |

OR: odds ratios; CI: confidence intervals; P: prevalence of the characteristic (per cent)

\*Unadjusted risk estimate
